# Supplementary material for: A general model of focal adhesion orientation dynamics in response to static and cyclic stretch
Source: PubMed Central journal article supplement (PMC6123675; doi:10.1038/s42003-018-0084-9), 2018-06-28
Supplement: 42003_2018_84_MOESM1_ESM.pdf [file 42003_2018_84_MOESM1_ESM.pdf]

## Supplementary Information

### Supplementary Figure 1

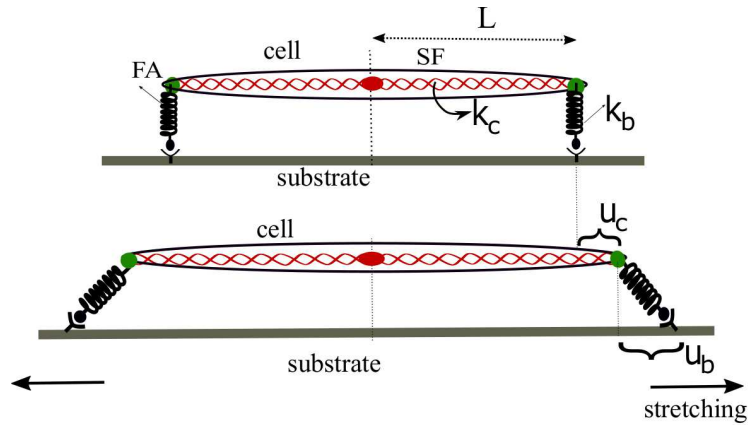

**Supplementary Figure 1.** Schematic diagram of the cell and the stress fiber (SF) adhering through two focal adhesions (FAs) under substrate stretching. The ligand-receptor bond is modelled as Hookian spring of spring constant  $k_b$  and the elasticity of the cell/stress fiber is represented by a spring of rigidity  $k_c$ . The bond displacement along the stretch direction is denoted by  $u_b$  and the cell spring displacement by  $u_c$ .
